# Supplementary material for: Understanding HRH recruitment in post-conflict settings: an analysis of central-level policies and processes in Timor-Leste (1999–2018)
Source: Springer Nature journal article supplement (doi:10.1186/s12960-018-0325-5), 2018-11-28
Supplement: MOESM1 [file 16304804]

**Additional file 1:** Summary of key bibliometric characteristics of documents reviewed

*Documents reviewed by year*

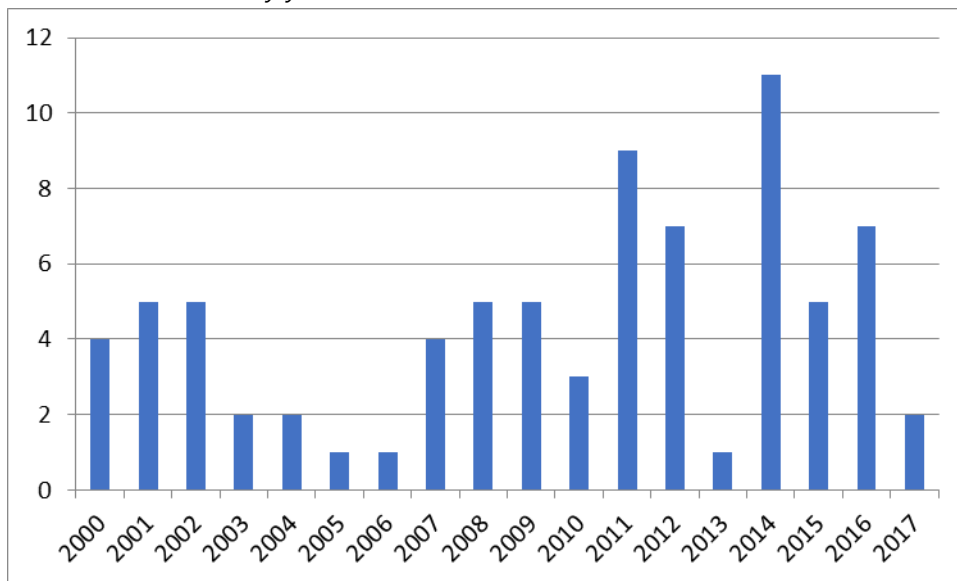

*Documents reviewed by type*

| <b>Type of document</b> | <b>#</b> |
|-------------------------|----------|
| Decree-Law              | 19       |
| Report                  | 12       |
| Book                    | 10       |
| Dispatch                | 8        |
| Directive               | 5        |
| <i>Others</i>           | 5        |
| Academic paper          | 4        |
| Law                     | 4        |
| Consultancy Report      | 3        |
| Policy                  | 2        |
| Executive Order         | 1        |
| Letter                  | 1        |
| Manual                  | 1        |
| Presentation            | 1        |
