# Supplementary material for: Understanding HRH recruitment in post-conflict settings: an analysis of central-level policies and processes in Timor-Leste (1999–2018)
Source: Springer Nature journal article supplement (doi:10.1186/s12960-018-0325-5), 2018-11-28
Supplement: MOESM3 [file 16304804]

**Additional File 3:** Data extraction template and coding framework for the documentary analysis

**Note:** Data extraction template: *entire table*; Coding framework: *grey background*

|                         |    |                                                                                                                                                                               |
|-------------------------|----|-------------------------------------------------------------------------------------------------------------------------------------------------------------------------------|
| Documents               | 1  | Year                                                                                                                                                                          |
|                         | 2  | Data extractor                                                                                                                                                                |
|                         | 3  | Category/folder                                                                                                                                                               |
|                         | 4  | Title of document                                                                                                                                                             |
|                         | 5  | Institution/organisation                                                                                                                                                      |
|                         | 6  | Type of document (see below)                                                                                                                                                  |
|                         | 7  | Source (e.g. personal contact, google search, etc.)                                                                                                                           |
| Health workforce issues | 8  | Situation analysis / challenges for Timor-Leste                                                                                                                               |
|                         | 9  | Situation analysis / challenges for the health sector                                                                                                                         |
|                         | 10 | Recruitment (attraction including scholarships, application, selection, appointment, induction)                                                                               |
|                         | 11 | Deployment (transfer, secondment, bonding, others?)                                                                                                                           |
|                         | 12 | HRH availability (stock, vacancies, etc.)                                                                                                                                     |
|                         | 13 | HRH accessibility (distribution by district, village, etc.)                                                                                                                   |
|                         | 14 | HRH acceptability (distribution by gender, age group, ethnic group, etc.)                                                                                                     |
|                         | 15 | HRH quality (distribution by cadre, academic grade, etc.)                                                                                                                     |
| Policy environment      | 16 | Policy objectives and approaches (content of the policy/change)                                                                                                               |
|                         | 17 | Actors involved in the policy making and policy implementation processes                                                                                                      |
|                         | 18 | Drivers of change (Why did the policy emerge? Who were the main actors involved in decision-making? What are other relevant factors (availability of evidence, funding, ...)) |
|                         | 19 | Financing of policies (if costs are involved, who is funding the policy?)                                                                                                     |
|                         | 20 | Implementation of policies (who was responsible for implementing the policies? What were the main strengths and weaknesses/challenges during implementation?)                 |
|                         | 21 | Impact of policies (what are the effects of the policy? Does it address the challenges identified? What are the remaining challenges?)                                        |
| Additional info         | 22 | Other relevant information                                                                                                                                                    |
|                         | 23 | Identified gaps (and possible source for the information)                                                                                                                     |
|                         | 24 | Any other comments                                                                                                                                                            |
